# Supplementary material
Source: ML conference proceedings conference paper supplement (https://openreview.net/forum?id=RhpGGXDg8S)
Supplement: supplementary_material [file attachment]

# Cluster-Phys: Facial Clues Clustering Towards Efficient Remote Physiological Measurement—Supplementary Material

Wei Qian\*

School of Computer Science and  
Information Engineering, School of  
Artificial Intelligence, Hefei  
University of Technology  
qianwei.hfut@gmail.com

Kun Li\*

CCAI, Zhejiang University  
kunli.hfut@gmail.com

Dan Guo<sup>†</sup>

Hefei University of Technology,  
Institute of Artificial Intelligence  
(IAI), Hefei Comprehensive National  
Science Center  
guodan@hfut.edu.cn

Bin Hu

Gansu Provincial Key Laboratory of  
Wearable Computing, School of  
Information Science and Engineering,  
Lanzhou University  
bh@lzu.edu.cn

Meng Wang<sup>†</sup>

Hefei University of Technology,  
Institute of Artificial Intelligence  
(IAI), Hefei Comprehensive National  
Science Center  
eric.mengwang@gmail.com

## ACM Reference Format:

Wei Qian, Kun Li, Dan Guo, Bin Hu, and Meng Wang. 2024. Cluster-Phys: Facial Clues Clustering Towards Efficient Remote Physiological Measurement—Supplementary Material. In *Proceedings of the 32nd ACM International Conference on Multimedia (MM '24)*, October 28–November 1, 2024, Melbourne, VIC, Australia. ACM, New York, NY, USA, 2 pages. <https://doi.org/10.1145/3664647.3680670>

## 1 Evaluation Metrics.

For average HR estimation, following the evaluation protocol [1, 2, 4], we report the most commonly used performance metrics, such as *Mean Absolute Error (MAE)*, *Root Mean Square Error (RMSE)*, *Standard Deviation (SD)*, and *Pearson correlation coefficient (r)*. For Heart Rate Variability (HRV) and Respiration Frequency (RF) estimation, we follow [3, 5] and report low frequency (LF), high frequency (HF), and LF/HF ratio.

## 2 Ablation Study of Hyper-parameters

As depicted in Fig. 1, we investigate different hyper-parameters in facial ROI prototypical clustering. For the iteration number  $M$ , we test its value of  $\{1, 2, 3, 4\}$  and set  $M$  to 3 to build prototypes. For the cluster sparse ratio  $\rho$ , we evaluate its value from 0.3 to 1.0. The results show that  $\rho=0.5$  performs best, and an excessively high sparsity will lead to the loss of crucial rPPG clues, leading to a decrease in performance. For the depth  $L$  of our Cluster-Phys, we search its value from 2 to 5. As shown in Fig. 1 (c), the deeper model

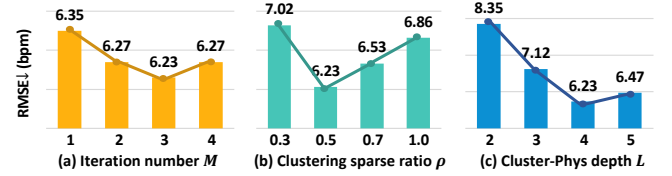

Figure 1: RMSE results of our Facial ROI Prototypical Clustering with different hyper-parameters on the VIPL-HR dataset.

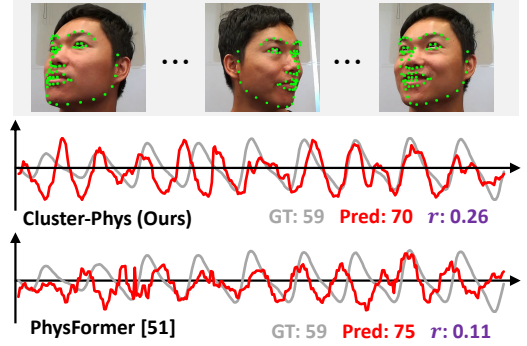

Figure 2: A failure case in VIPL-HR.

\*Wei Qian and Kun Li contributed equally to this research.

<sup>†</sup>Corresponding authors

Permission to make digital or hard copies of all or part of this work for personal or classroom use is granted without fee provided that copies are not made or distributed for profit or commercial advantage and that copies bear this notice and the full citation on the first page. Copyrights for components of this work owned by others than the author(s) must be honored. Abstracting with credit is permitted. To copy otherwise, or republish, to post on servers or to redistribute to lists, requires prior specific permission and/or a fee. Request permissions from [permissions@acm.org](mailto:permissions@acm.org).

MM '24, October 28–November 1, 2024, Melbourne, VIC, Australia

© 2024 Copyright held by the owner/author(s). Publication rights licensed to ACM.

ACM ISBN 979-8-4007-0686-8/24/10

<https://doi.org/10.1145/3664647.3680670>

will make it difficult for the model to converge, which is harmful to the performance.

## 3 More Implementation Details.

For each video, we extract the facial ROI regions using landmark detection to generate the MSTmap [4]. The MSTmap and its corresponding Heart Rate (HR) label are sampled at a rate of 30Hz within the video. Each MSTmap is configured to consist of 300 frames, with a sliding window of 15 frames overlapping with the adjacent MSTmap. The model is trained by the Adam optimizer with a learning rate of  $1e^{-4}$  and a batch size of 16. We train the

model for 100 epochs on the VIPL-HR dataset and 30 epochs on the other datasets.

#### 4 Failure Case.

We visualize a fail case from VIPL-HR in Fig. 2. *Inaccurate landmark detection* is inevitable with *intense head movements*. Our average Pearson correlation coefficient ( $r \uparrow$ ) on VIPL-HR is 0.84. In this case, our  $r$  is 0.26, whereas PhysFormer has a  $r$  of 0.11. Although our method performs better than PhysFormer, it is significantly lower than the average  $r$  by a large margin. How to exploit occluded areas more effectively is a direction for future research. From a practical perspective, a multi-camera setup is considered a good solution. Additionally, we may need to address new challenges such as multi-camera alignment.

#### 5 Limitation

For the HR estimation task, inaccurate landmarks caused by intense head movements are inevitable to reduce the accuracy of facial ROI; cross-domain learning and cross-ethnic application remain

challenges described in Section 4.3 (see experiments in Table 2 of the main paper). These are also some limitations of most current HR estimation methods. For our method, the cluster ratio is a fixed hyperparameter in each step. Developing an adaptive clustering strategy will be our future research.

#### References

- [1] Weixuan Chen and Daniel McDuff. 2018. Deepphys: Video-based physiological measurement using convolutional attention networks. In *Proceedings of the European Conference on Computer Vision*. 349–365.
- [2] Xiaobai Li, Jie Chen, Guoying Zhao, and Matti Pietikainen. 2014. Remote heart rate measurement from face videos under realistic situations. In *Proceedings of the IEEE/CVF Conference on Computer Vision and Pattern Recognition*. 4264–4271.
- [3] Hao Lu, Hu Han, and S Kevin Zhou. 2021. Dual-gan: Joint bvp and noise modeling for remote physiological measurement. In *Proceedings of the IEEE/CVF Conference on Computer Vision and Pattern Recognition*. 12404–12413.
- [4] Xuesong Niu, Zitong Yu, Hu Han, Xiaobai Li, Shiguang Shan, and Guoying Zhao. 2020. Video-based remote physiological measurement via cross-verified feature disentangling. In *Proceedings of the European Conference on Computer Vision*. 295–310.
- [5] Zhaodong Sun and Xiaobai Li. 2024. Contrast-Phys+: Unsupervised and Weakly-supervised Video-based Remote Physiological Measurement via Spatiotemporal Contrast. *IEEE Transactions on Pattern Analysis and Machine Intelligence* (2024).
